# Supplementary material
Source: publisher figshare collection journal article supplement (https://sage.figshare.com/ndownloader/files/23208404)
Supplement: Supplementary file 1 [file 23208404]

## Supplemental material

### Scoring

*Diversity score:* 1=yes; 0=no.

*Frequency score:* 1 (1x/ last 4 months); 2 (2x/ last 4 months); 3 (1x/ month); 4 (2-3x/ month); 5 (1x/ week) ; 6 (2-3x/ week); 7 (1x/ day or more).

*With Whom score:* 1 – alone; 2 – with parents; 3 – with family members; 4 – with friends; 5 – with others—i.e., coaches, teachers, tutors.

*Where score:* 1 - at home; 2 – at relatives home; 3 - neighborhood; 4 – at school (but not during class); 5 – in your community; 6 - beyond your community.

*Enjoyment score:* 1 – not at all; 2 - somewhat; 3 – pretty much; 4 – very much; 5 – love it.

### Activities

Recreational activities: Doing puzzles; Playing board or card games; Doing crafts, drawing, coloring; Collecting things; Playing computer or video games; Playing with pets; Doing pretend or imaginary play; Playing with things or toys; Going for a walk or hike; Playing on equipment; Watching TV or a rented movie; Taking care of a pet.

Physical activities: Doing martial arts; Racing or track and field; Doing team sports; Participating in school clubs; Bicycling, in-line skating, or skateboarding; Doing water sports; Doing snow sports; Playing games; Gardening; Fishing; Doing individual physical activities; Doing a paid job; Playing non-team sports.

Social activities: Talking on the phone; Going to a party; Hanging out; Visiting; Entertaining others; Going to the movies; Going to a live event; Going on a full-day outing; Listening to music; Making food.

Skill-based activities: Swimming; Doing gymnastics; Horseback riding; Learning to sing (choir or individual lessons); Taking art lessons; Learning to dance; Playing a musical instrument; Taking music lessons; Participating in community organizations; Dancing.

Self-improvement activities: Getting extra help for schoolwork from a tutor; Doing a religious activity; Writing letters; Writing a story; Going to a public library; Reading; Doing volunteer work; Doing a chore; Doing homework; Shopping.

Informal domain: Doing puzzles; Playing board or card games; Doing crafts, drawing, coloring; Collecting things; Playing computer or video games; Playing with pets; Doing pretend or imaginary play; Playing with things or toys; Going for a walk or hike; Playing on equipment; Watching TV or a rented movie; Taking care of a pet; Bicycling, in-line skating, or skateboarding; Doing water sports; Doing snow sports; Playing games; Gardening; Fishing; Doing individual physical activities; Playing non-team sports; Doing a paid job; Talking on the phone; Going to a party; Hanging out; Visiting; Entertaining others; Going to the movies; Going to a live event; Going on a full-day outing; Listening to music; Making food; Dancing; Writing letters; Writing a story; Going to a public library; Reading; Doing volunteer work; Doing a chore; Doing homework; Shopping.

Formal domain: Doing martial arts; Racing or track and field; Doing team sports; Participating in school clubs; Swimming; Doing gymnastics; Horseback riding; Learning to sing (choir or individual lessons); Taking art lessons; Learning to dance; Playing a musical instrument; Taking music lessons; Participating in community organizations; Getting extra help for schoolwork from a tutor; Doing a religious activity.

Overall: Doing puzzles; Playing board or card games; Doing crafts, drawing, coloring; Collecting things; Playing computer or video games; Playing with pets; Doing pretend or imaginary play; Playing with things or toys; Going for a walk or hike; Playing on equipment; Watching TV or a rented movie; Taking care of a pet; Bicycling, in-line skating, or skateboarding; Doing water sports; Doing snow sports; Playing games; Gardening; Fishing; Doing individual physical activities; Playing non-team sports; Doing a paid job; Talking on the phone; Going to a party; Hanging out; Visiting; Entertaining others; Going to the movies; Going to a live event; Going on a full-day outing; Listening to music; Making food; Dancing; Writing letters; Writing a story; Going to a public library; Reading; Doing volunteer work; Doing a chore; Doing homework; Shopping; Doing martial arts; Racing or track and field; Doing team sports; Participating in school clubs; Swimming; Doing gymnastics; Horseback riding; Learning to sing (choir or individual lessons); Taking art lessons; Learning to dance; Playing a musical instrument; Taking music lessons; Participating in community organizations; Getting extra help for schoolwork from a tutor; Doing a religious activity.
